# Supplementary material for: A K+-selective CNG channel orchestrates Ca2+ signalling in zebrafish sperm
Source: eLife. 2015 Dec 9;4:e07624. doi: 10.7554/eLife.07624 (PMC4749565; doi:10.7554/eLife.07624)
Supplement: Figure 2—source data 1. — a m indicates oxidized methionine, b△M [ppm] relative mass error, c XCorr, △Score, and △Cn indicate results based on searches with the sequest algorithm in Proteome Discoverer; d PEP (Posterior Error Probability) describes the probability that the observed hit is a chance event. DOI: http://dx.doi.org/10.7554/eLife.07624.008 [file elife-07624-fig2-data1.xlsx]

## Sheet: Tabelle1
	Sequencea		Start- End		Charge		MH+ [Da]		ΔM [ppm]b		Modifications		ΔScorec		PEP (*10-5)d		ΔCnc		XCorrc
	AGEINQNLYYIK		370-381		2		1425.74		-0.128463				1		4.44		0		3.22835
	YATLVEDAK		978-986		2		1009.52		-0.0844017				1		6.75		0		2.69783
	LQESQSDVQDSPTHSASmR		987-1006		3		2118.94		-0.130888		M18(Oxidation)		1		0.03		0		3.20401
	GEVEVLSNNESK		1511-1522		2		1304.63		0.709288				1		0.69		0		3.61616
	LSAGQYFGER		1527-1536		2		1127.55		-0.0177983				1		22.12		0		2.63881
	AATNSEmYVLSQK		1550-1562		2		1457.69		-0.409727		M7(Oxidation)		1		0.92		0		2.92362
	AATNSEMYVLSQK		1550-1562		2		1441.7		0.376868				1		1.94		0		2.75383
	LQTILEYmK		1925-1933		2		1154.61		0.0885121		M8(Oxidation)		1		1665		0		1.67765
