# Supplementary material for: A K+-selective CNG channel orchestrates Ca2+ signalling in zebrafish sperm
Source: eLife. 2015 Dec 9;4:e07624. doi: 10.7554/eLife.07624 (PMC4749565; doi:10.7554/eLife.07624)
Supplement: Figure 2—source data 2. — a m indicates oxidized methionine, b△M [ppm] for all peptides is below ± 2.5, c XCorr indicates results based on searches with the sequest algorithm; Amanda indicates results based on searches with the MS Amanda algorithm, d PEP (Posterior Error Probability) describes the probability that the observed hit is a chance event; △Score and △Cn are not indicated separately since the scores for all peptides are 1 and 0, respectively. DOI: http://dx.doi.org/10.7554/eLife.07624.009 [file elife-07624-fig2-data2.xlsx]

## Sheet: Tabelle1
								Whole sperm											heads											flagella
	Sequencea		MH+ [Da]b		Start - End			Charge		XCorrc		PEP (*10-5)d		Amandac		PEP (*10-5)d			Charge		XCorrc		PEP (*10-5)d		Amandac		PEP (*10-5)d			Charge		XCorrc		PEP (*10-5)d		Amandac		PEP (*10-5)d
	NITGLMDDLPNVLR		1570.83		310-323			2		4.06409		16		178.258		0.02			2		3.20162		9.5		79.2085		0.01
	NITGLmDDLPNVLR		1586.82		310-323														2		2.39359		803.1		78.9262		75.9
	TYTYIPGQTLAK		1355.72		358-369			2		2.78637		563.8		109.717		348.5			2		2.52586		3165		90.9073		695.2			2		2.57343		12200		110.115		656.5
	AGEINQNLYYIK		1425.74		370-381			2		3.97783		56.1		126.322		9.6														2		3.62617		0.4		156.6		19.4
	DLLSLFDEFPEAAVQISR		2050.05		435-452			3		4.15027		3e-05		230.002		0.0003			2		5.44479		0.005		222.001		4e-11			3		4.70505		0.4		198.88		0.002
	DGHVTDLAVIFR		1342.71		596-607														2		2.12243		1962		69.7661		10
	LTFQNVFSEMR		1371.67		784-794			2		3.53215		0.1		125.279		1.1			2		3.0566		5.2		110.316		40.6			2		2.92679		0.1		111.595		18.2
	LTFQNVFSEmR		1387.67		784-794														2		2.29986		1536		46.4299		128.9
	NYMNLLWNK		1195.59		812-820			2		2.38406		3640		96.4163		514.1
	YQGAAYPGGPFLMHDLSIELK		2307.15		821-841			2		4.09311		1.3		148.503		0.02			2		2.95394		141.7		109.553		18.3			3		2.39973		42.9		77.3861		384.9
	YQGAAYPGGPFLmHDLSIELK		2323.14		821-841														3		2.36612		487.5		47.8712		350.6
	DDLSEIVGHYYK		1438.69		908-919			3						44.7445		2130
	YATLVEDAK		1009.52		978-986														2		1.92162		136		53.1786		45.3
	KLQESQSDVQDSPTHSASMR		2231.04		987-1006			3		4.01163		4e-05		126.65		0.004
	LQESQSDVQDSPTHSASMR		2102.94		988-1006			3		2.68459		48.4		110.511		1.7														3		2.09228		2344		36.5039		5538
	FGNILMYAGPEEEMTR		1857.85		1023-1038			2		3.75961		10.1		134.509		0.006			2		3.25144		26.2		91.8054		0.0004
	AVYFFLR		915.51		1054-1060			2						63.9403		13240			2		1.82762		2959		130.669		483.7			2		1.84773		2800		97.1817		1878
	IFQSVFLMR		1140.62		1061-1069			2		2.09994		58.8		128.387		34.9
	TPHILQLYR		1140.65		1196-1204			3		3.536		14.7		118.713		2.5			3		3.3714		54.8		139.736		0.02
	LTGALYNQVIGFYK		1586.86		1373-1386			2		3.22401		0.002		192.345		0.02			2		3.89853		3.4		168.474		2e-07			2		3.17596		2e-05		167.001		0.2
	LSLPVFEMTLSK		1364.75		1469-1480			2		2.53674		48.8		110.985		88.6			2		2.13191		158.5		73.2241		10.1			2		3.18596		0.09		115.113		4.7
	GEVEVLSNNESK		1304.63		1511-1522			2		2.77067		375.5		55.948		297.6			2		2.1134		258.4		84.3843		0.6
	LSAGQYFGER		1127.55		1527-1536			2		3.22872		13.3		94.7617		2.3			2		2.75905		8.3		112.355		15.5			2		2.70565		37.7		99.6813		91.8
	AATNSEMYVLSQK		1441.7		1550-1562			2		3.98189		0.04		110.203		1.7			2		2.87876		2.9		135.265		0.005			2		4.1899		9.6		125.099		1.3
	DLLHEDYQIHAPARPDSAPTTFR		2650.3		1587-1609																									4		2.07648		440.1
	IFNFIR		809.467		1654-1659														2		1.38292		14730		74.7756		15960
	DSPLFLPIMIIYAR		1648.91		1773-1786			2		4.45484		0.5		151.601		0.03			2		2.46562		1645		111.265		122.9			2		3.29386		1e-05		165.962		0.4
	VSHFYNYQWNR		1513.7		1945-1955			2		1.91831		13350		38.2027		6372
	SHHLFSHFTIPVMR		1708.87		1987-2000			3		2.8028		2605		54.8632		1888			3		3.19231		0.9		99.965		1			4						49.8187		3884
	HDTAIAANYVDVAVLSK		1786.93		2067-2083																									3						60.926		149.4
