# Supplementary material for: A K+-selective CNG channel orchestrates Ca2+ signalling in zebrafish sperm
Source: eLife journal article supplement (doi:10.7554/elife.07624), 2015-12-09
Supplement: supp [file elife-07624-supp-v1.zip]

MHDPREMKDEASIRSPKQ~~RNVRLWSAFFSLTCLAAVLECLFELFFNSDISGLSEFMRYILDVIFIINIIS~~RFFFIGYEVHGV - 80

VITDPKKVRKKYLRT~~WFFFDLLSVLPFQALKQVHPYMRFLASRCLRVFRLFTIISYFSKEPD~~TNKVLLT~~AFRMF~~SIMAL - 160

~~SVQFSACLWFNQV~~CDADYKGHKKVCTKGDNWLLLLSESNLTGISDVEWYAT~~SVYWSVITLCTIGYGD~~IHATNLEESTVAS - 240

~~VVMLLGLLAFGFSM~~SSSLSTVISNMASLRGRFHHRIEAVLHYMMHMDLPMEIQTMVHHYYYYLWLHQGRNITGLMDDLPN - 320

VLREDISSCYRSLIKKAKLFRNTANGFKMALSLKLKTYTYIPGQTLAKAGEINQONLYYIKHGHVQVFSQNPVEEIATLL - 400

PGTLFGEVHLLYEIPRNVITIRASTLCEITILEHKDLLSLFDEFPEAAVQISRDAKTRLQNLRCPIEEAYIFGLASIPQNV - 480

AFEREQWINLQPREQRIFAASFEYASNQIPPMNSFWKTTFHQPQSAFIKTWR~~YFFSWCLTVSVFLEAWVFF~~THSADAKGV - 560

FTEDWGAF~~YFVFKVLIYIVAAFDIF~~VNLRTDVFTKDGHVTDLAVIFRVYRKSWN~~FYDVLALLPLELISFAFGATEP~~WTV - 640

~~SCLVRLNRLLLIRRIYLYFRQNECDLYSHLYEQRIAKCLFIFFFSLHFCAGMLYLSAC~~DNKRCLEESWAWNAGLKPSQSS - 720

FEHYIIT~~VYWTTTFTTSVGYGD~~IVPGSLIEQ~~CLAAIVGLIGMLVLT~~YVIGLMCATISDRNAKRLTFQNVFSEMRQFMERH - 800

GVAASLQIRVKNYMNLWNKYQGAAYPGGPFLMHDLSIELKHSVLMAERGELLSQLPFFSEAEQSFIONLALTSVIYSFP - 880

EGEIIQYSNTLSTELFCILQGTCQILKDDLSEIVGHYYKGMFFGEAGFLFGKPATLTVRAMTCCKIVVIDFDKVKVLEK - 960

HPRLKSQIKQSCANPQRYATLVEDAKKLQESQSDVQDSPTHSASMRFQGSRNSSNSKCCVEKFGNILMYAGPEEEMTRMQ - 1040

DVSHQRPSTVMGRAVYFFLRIFQSVFLMRSAILPWSP~~WYVKWEVFRSITAVAVSIATSL~~LFAFLHFQOMEL~~WIICYILGLF~~ - 1120

~~CWVDMYIRMHVAFYKENILKVD~~TLETACHYFKTG~~FLLDFITCFPWELVSWIV~~IPPFSENGFLVSNEYLH~~FYAYLRTPHIL~~ - 1200

QLYRIPLLISYLESDIAAATNTIT~~TSFKLFLYSTLVLHFSTCILF~~ASSCPAIGLYENTTNYFLPEIKHNCTPLSWVTHLDA - 1280

TFNIDFGTASFLQIYLM~~SLYFATSTLCTVGF~~GDIIYPCLSAS~~RAGQVFIMLIGVLEFGWLS~~GSVTGMLANTDALRAAYTEK - 1360

AESMKLFLKSHRLTGALYNQVIGFYKFRWMCTKGFQDKLSQYLPSSLVSDLSTVLYADFIKVFGLKI~~QRTTTQ~~ESEIN - 1440

LLSTVEITRAGKLSLPVFEMTLSKTWLE~~QLE~~NDGCFIRLLAGGVSQCLYRASDVYKKGDCGSEVYFVEKGEVEVLSNNE - 1520

SKVLFKLSAGQYFGERSLLFHEPRAATIRAATNSEMYVLSQKSLHEILKYYPHIHEQMSSADEIKDLLHEDYQIHAPAR - 1600

PDSAPTTFRRAGWEQLYRDHMTENEERAILRLQPLHVRLWTRVSPLLIWFLKIFNFIRMSNNRTMDADNS~~FRVVYQYTG~~ - 1680

~~CILFTILFWAIT~~LMSSVHSVNV~~YLLLLTTCTQVFQMF~~EIFLKFHIATYDDHRAFASDYKSTSHSYLTR~~KFGFAFD~~MACAF - 1760

~~PFGLIIVHLVEK~~DSPLFLP~~IMIIYARIAHLPRIISLLVFMWKEEQSITSNLLCIRMIKFFVHSVLFVHCAAMLCVS~~FVEI - 1840

YGVMSWIAEIEISDFSEMYKY~~AVYWIVQIYTTVGF~~GDILSLNLGE~~VMAC~~TFIMILSKI~~QVIYKM~~GLLIATQTNKNTLQVA - 1920

FEAKLQ~~TILEYMKHERIPRQLQNRVSHFYNYQWNR~~NKGICTEELFRGVPRCLKMDVLMSICGEYLKSHHLFSHFTIPVMR - 2000

ELSARVTFRCFPVGECIYRKGDSTGEIYFLLIGKVNLCCLDTRGHEVYQRLCRGTAFGDRIVIEHTRHDTAIAANYVDVAV - 2080

LSKTSLASLSHLYPAAMHKLKEKLADIQQE - 2110

Figure 1-figure supplement 1
