# Supplementary material for: A K+-selective CNG channel orchestrates Ca2+ signalling in zebrafish sperm
Source: eLife journal article supplement (doi:10.7554/elife.07624), 2015-12-09
Supplement: supp [file elife-07624-supp-v1.zip]

|                |      | $\alpha$ A  | $\beta$ 1  | $\beta$ 2 | $\beta$ 3  | $\beta$ 4    | $\beta$ 5             |      |
|----------------|------|-------------|------------|-----------|------------|--------------|-----------------------|------|
| <i>DrCNBD1</i> | 347  | GFKMALSLKLT | TYTYPGQT   | LAKAGE--  | INQNL      | YYIKHGHVQVFS | ----QNPEVEIATLL       | 400  |
| <i>DrCNBD2</i> | 865  | SFIQNLALTS  | VIYSFPEGEI | IQYSNT--  | LSTELFCILQ | GTCQILK----  | DDLSEIVGHYY           | 918  |
| <i>DrCNBD3</i> | 1476 | -FIRLLAGGS  | QCLYRASDV  | IYKKGD--  | CGSEVYFVEK | GEVEVLS----  | NNESKVLFKLS           | 1528 |
| <i>DrCNBD4</i> | 1997 | PVMRELSARV  | TFRCFPVGE  | CIYRKGD-- | SGTEIYFLLI | GKVNLC       | LD---TRGHEVYQRLC      | 2051 |
| <i>ApCNBD1</i> | 377  | GFLRMLSLEI  | KPSLYLPRQ  | TIADRNE-- | ICHDMYFIQR | GEIEILSA---  | EDDDTPIERLN           | 431  |
| <i>ApCNBD2</i> | 927  | NFLRMLALKL  | HVFIFMPGD  | VVVYQGD-- | MGREMYFIRR | GTC          | EVLS----KDGKHMVSNIG   | 981  |
| <i>ApCNBD3</i> | 1476 | GFQKMLAMCI  | KPVYYLNKE  | YIVRKHD-- | FGKEMFFIHR | GLVEVVS----  | EDGSIVFDTMQ           | 1529 |
| <i>ApCNBD4</i> | 2110 | SFHRALSMLK  | PVLFMPSDL  | LIVRQGD-- | VGDEMYFISR | GVVEEMEV---  | NSNSRVARILE           | 2164 |
|                |      | $\beta$ 6   | $\beta$ 7  | $\beta$ 8 | $\alpha$ B | $\alpha$ C   |                       |      |
| <i>DrCNBD1</i> | 401  | PGTLFGEVH   | -LLYEIPRN  | VTIRASTL  | CEITILEH   | KDLLSLFDE    | FPEAAVQISRDAKTRLQN    | 460  |
| <i>DrCNBD2</i> | 919  | KGMFFGEAG   | -FLFGKPAT  | LTVRAMTC  | CKIVVIDF   | DKVKVLEK     | HPRLKSQIKQSCANPQRY    | 978  |
| <i>DrCNBD3</i> | 1529 | AGQYFGERS   | -LLFHEPRA  | ATIRAATN  | SEMYVLSQ   | KSLEILKYY    | PHIEQMSSADEIKDL       | 1588 |
| <i>DrCNBD4</i> | 2052 | RGTAFGDR    | --IVIEHTR  | RHDTAIAA  | NYVDVAVL   | SKTSLASL     | SHLYPAAMHKLKEKLADIQQE | 2110 |
| <i>ApCNBD1</i> | 432  | HGKLFGEVS   | -LIFSMPTN  | RIRAAAH   | CDLLVLDK   | ADLQNLH      | HYPEVAKKLQQIAEQRCDA   | 491  |
| <i>ApCNBD2</i> | 982  | PSQYFGEVG   | -LIFGDYRT  | ATVRAASY  | CELLMLKR   | ADLDDVL      | KHFPLIEKQFSDAAKNQGH   | 1041 |
| <i>ApCNBD3</i> | 1530 | SGRFFGEIS   | -LVFSCPRT  | ASIRAENN  | VDMFVLTK   | EDLDEVLT     | HYPISIKAQIYTVAEERISA  | 1589 |
| <i>ApCNBD4</i> | 2165 | SGEFFDD     | INLLYDVPR  | RTSFKARTH | VDVKSLSV   | RDLTSVLE     | QYPNVEAQIRRIGKELYGD   | 2224 |
| <i>DrCNBD1</i> | 461  | LR---       | 462        |           |            |              |                       |      |
| <i>DrCNBD2</i> | 979  | ATLVE       | 983        |           |            |              |                       |      |
| <i>DrCNBD3</i> | 1589 | LHEDY       | 1593       |           |            |              |                       |      |
| <i>DrCNBD4</i> |      |             |            |           |            |              |                       |      |
| <i>ApCNBD1</i> | 495  | AGLLE       | 496        |           |            |              |                       |      |
| <i>ApCNBD2</i> | 1042 | REL         | RD 1046    |           |            |              |                       |      |
| <i>ApCNBD3</i> | 1590 | VRKRS       | 1594       |           |            |              |                       |      |
| <i>ApCNBD4</i> | 2225 | YAASI       | 2229       |           |            |              |                       |      |

Figure 3-figure supplement 2
