# Supplementary figures and images for: A K+-selective CNG channel orchestrates Ca2+ signalling in zebrafish sperm
Source: eLife journal article supplement (doi:10.7554/elife.07624), 2015-12-09

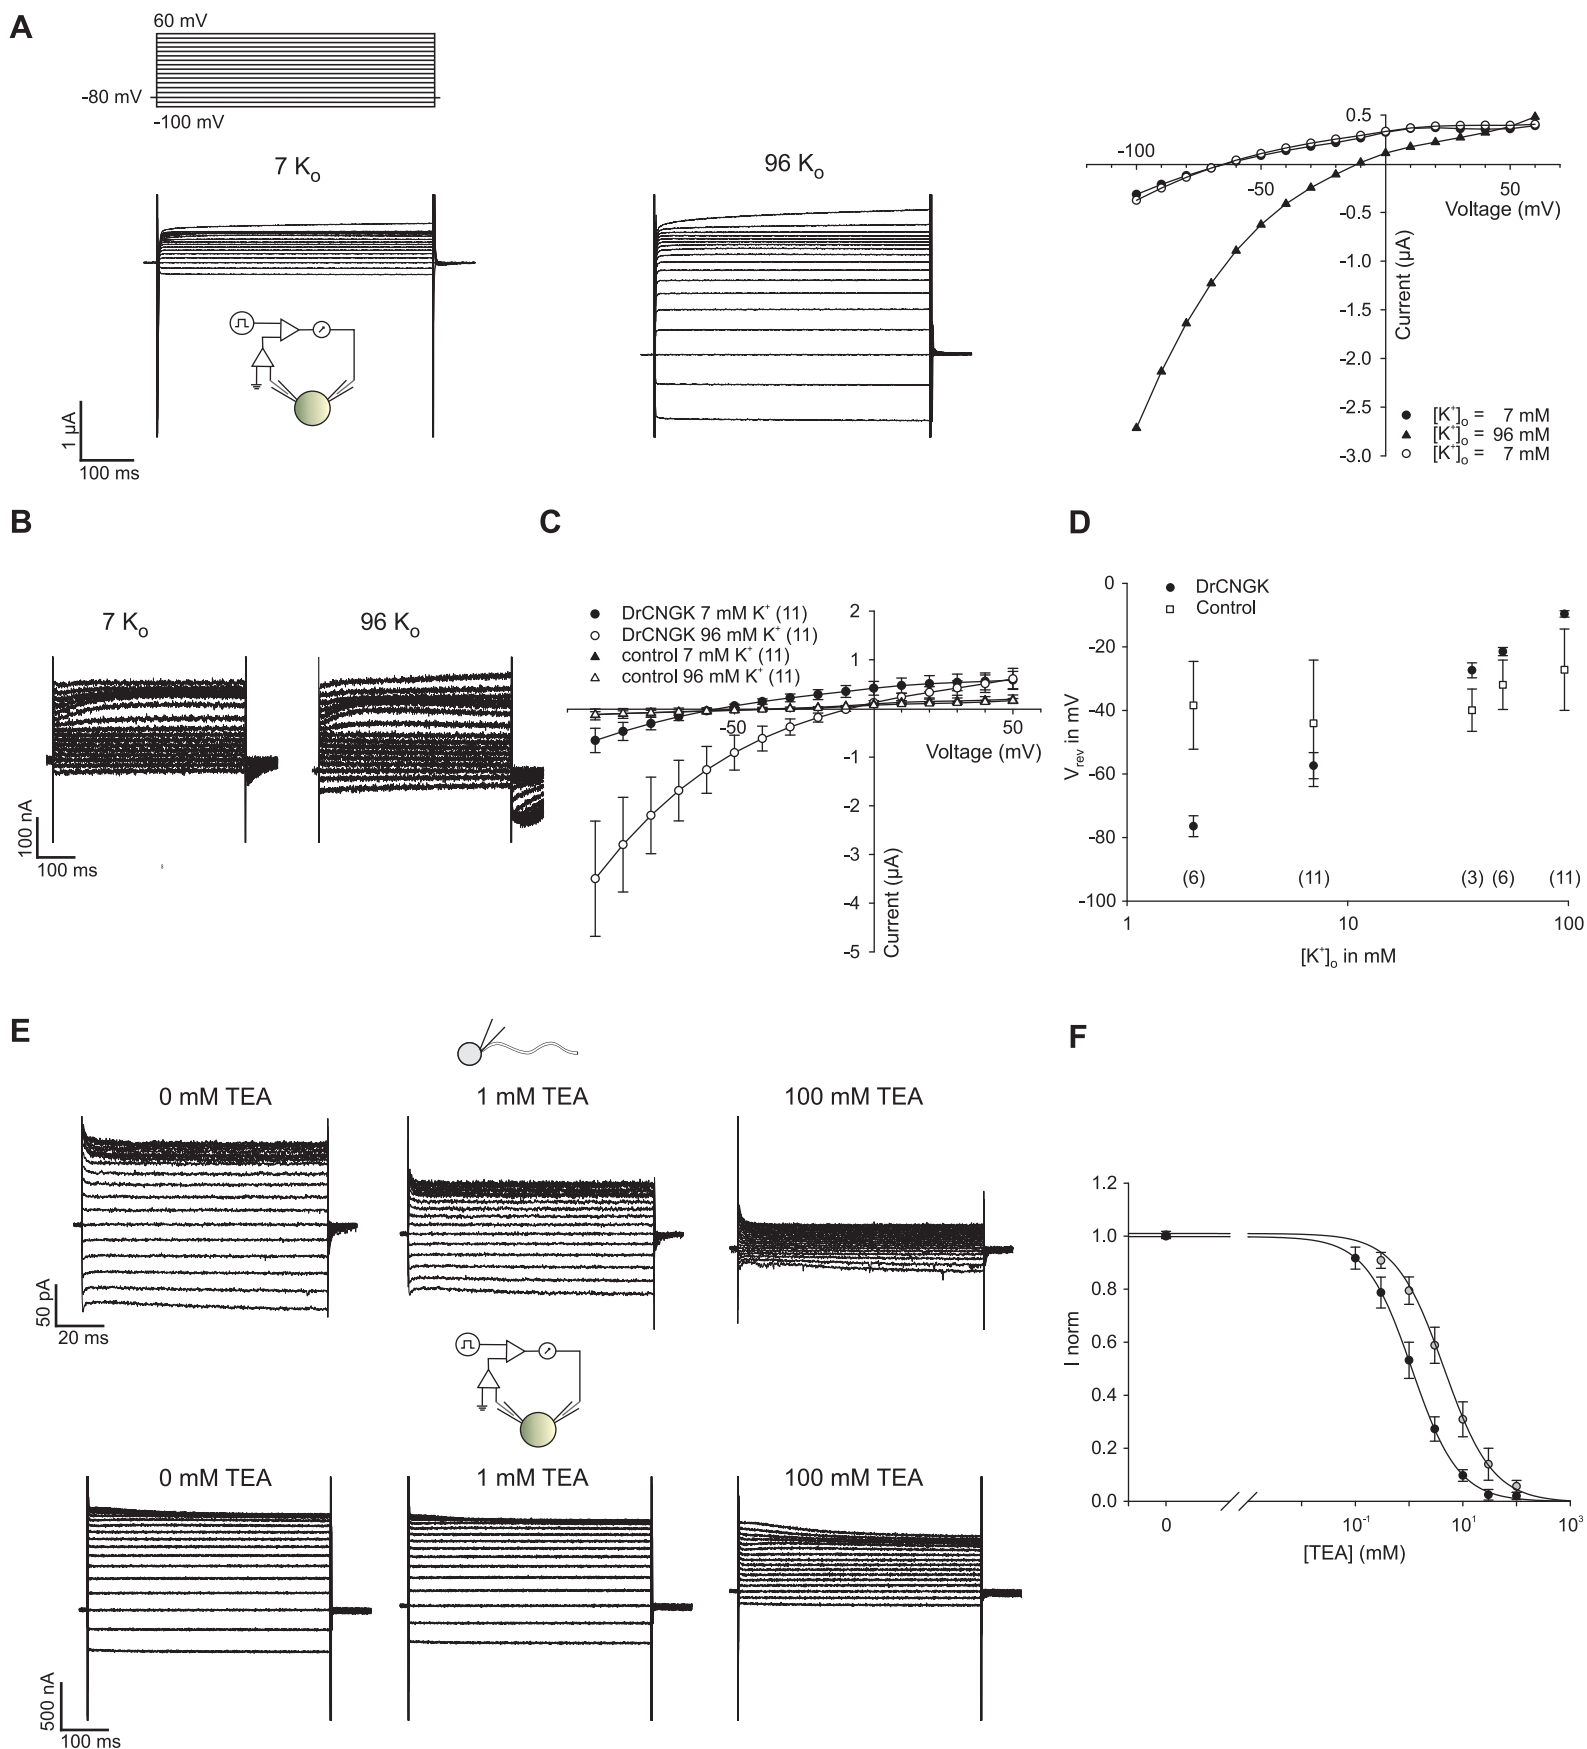

Figure 3-figure supplement 1

Supplement: supp [file elife-07624-supp-v1.zip]

**A** DrCNGK

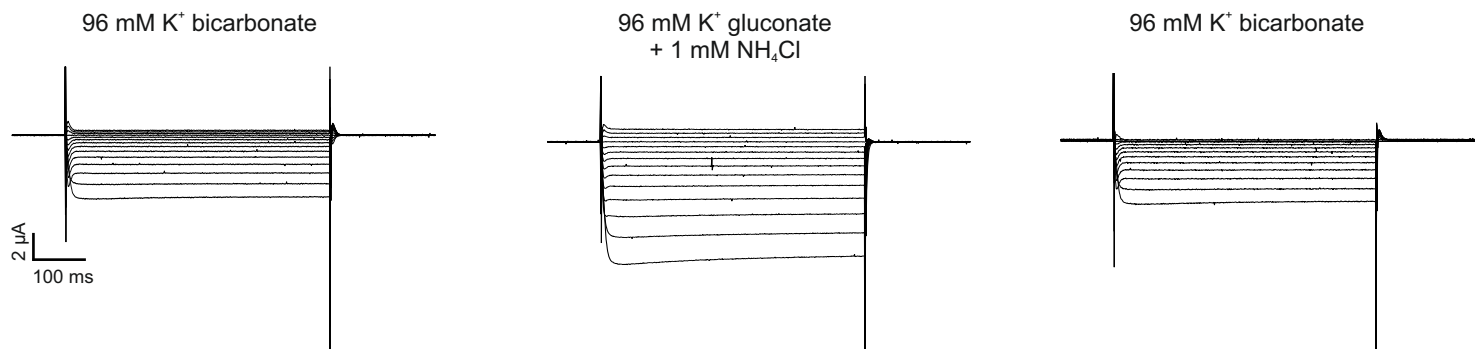

**B** Control

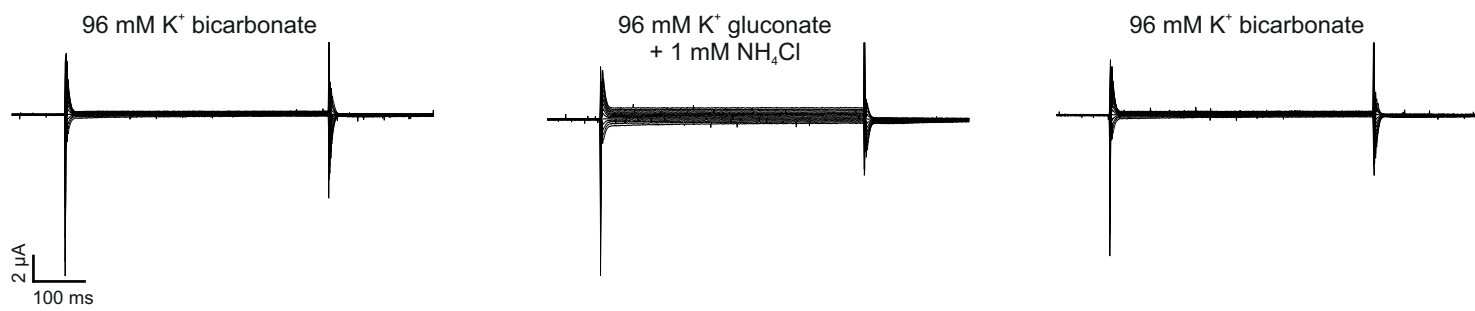

Figure 5-figure supplement 1

Supplement: supp [file elife-07624-supp-v1.zip]

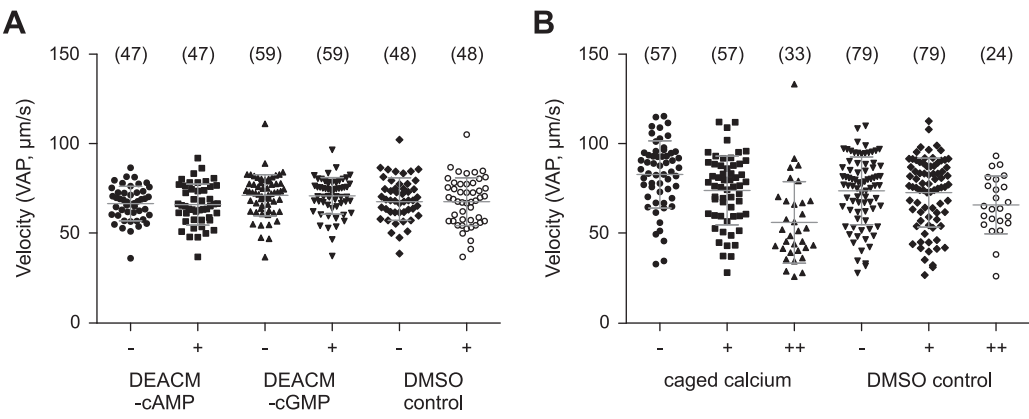

Figure 3-figure supplement 4

Supplement: supp [file elife-07624-supp-v1.zip]

whole sperm

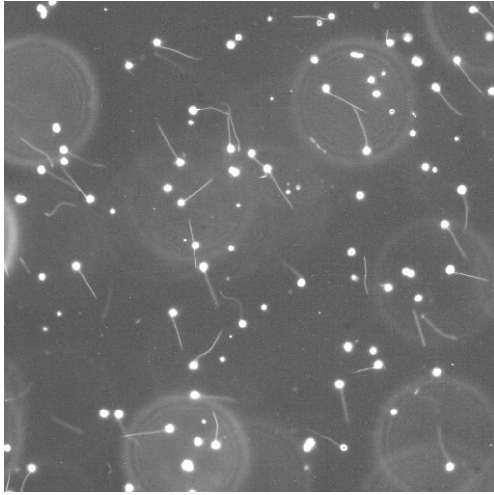

heads

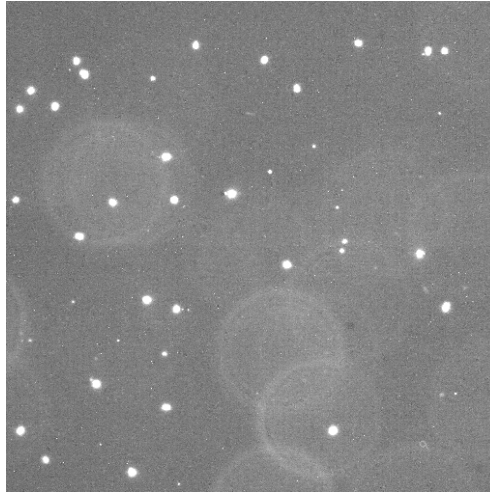

flagella

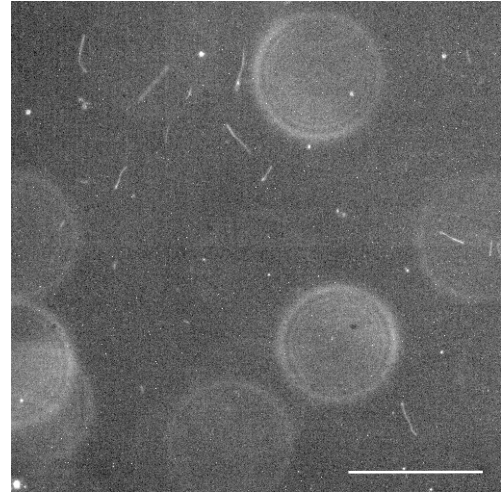

Figure 1-figure supplement 2

Supplement: supp [file elife-07624-supp-v1.zip]

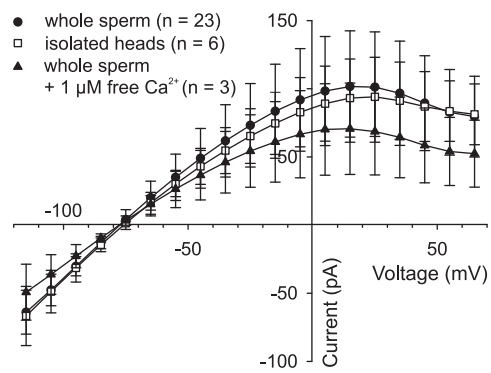

Figure 5-figure supplement 2

Supplement: supp [file elife-07624-supp-v1.zip]

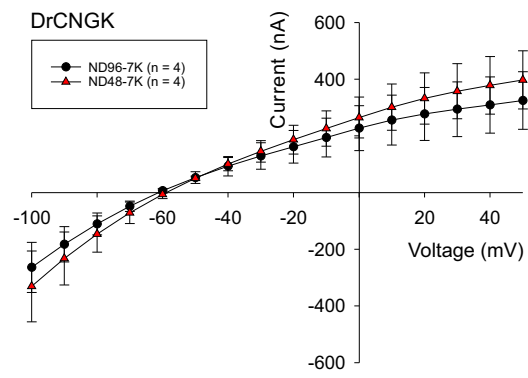

Figure 5-figure supplement 3

Supplement: supp [file elife-07624-supp-v1.zip]

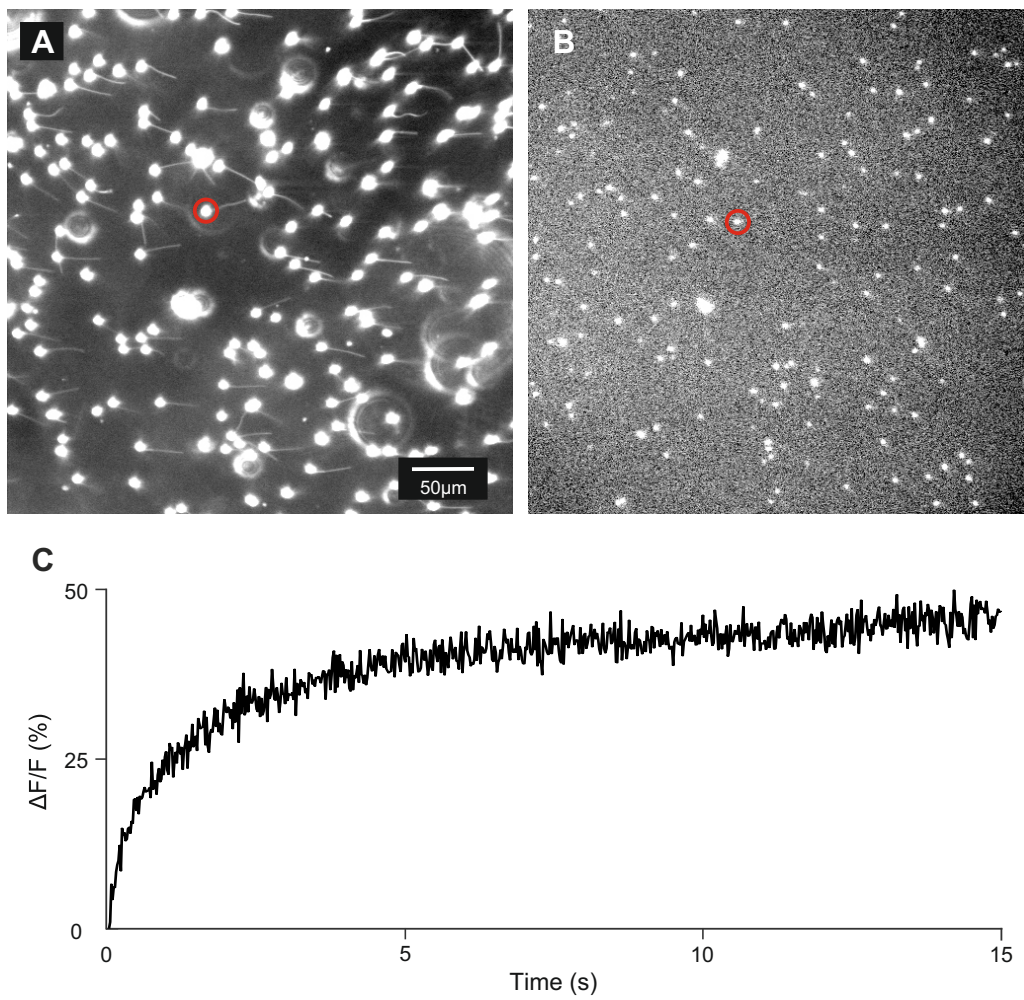

Figure 3-figure supplement 5

Supplement: supp [file elife-07624-supp-v1.zip]

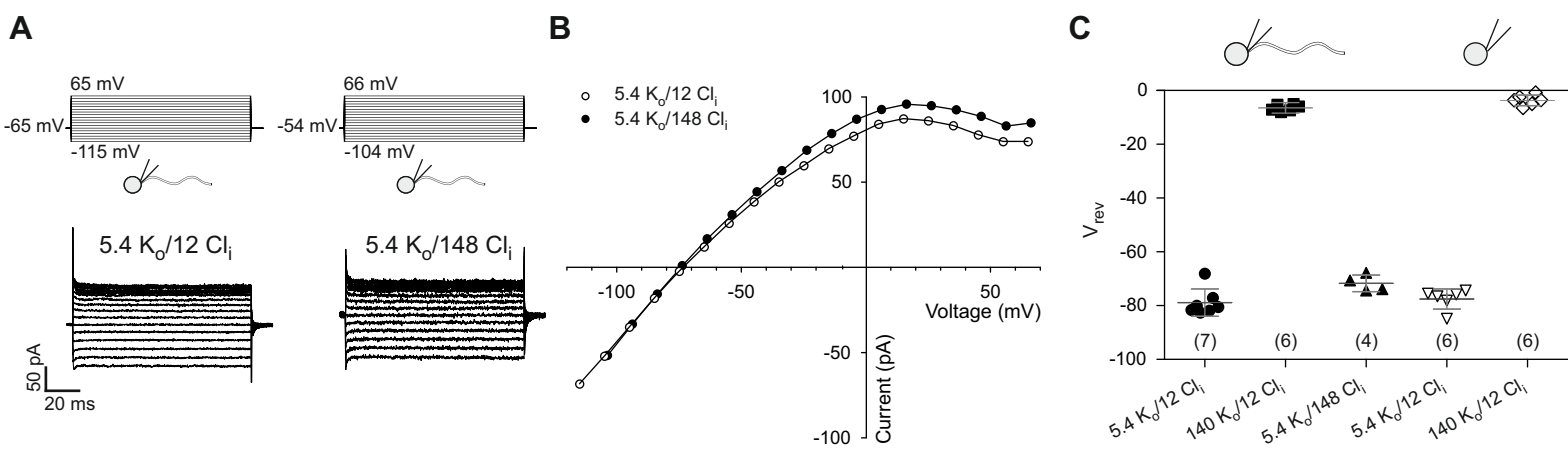

Figure 1-figure supplement 3

Supplement: supp [file elife-07624-supp-v1.zip]

**A**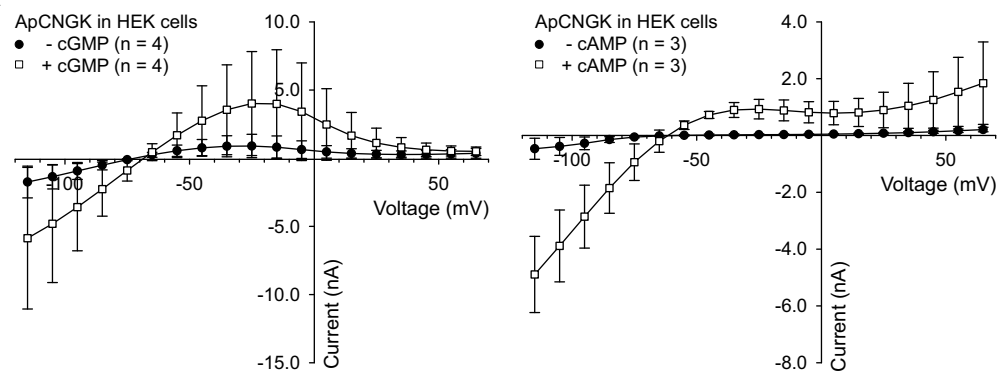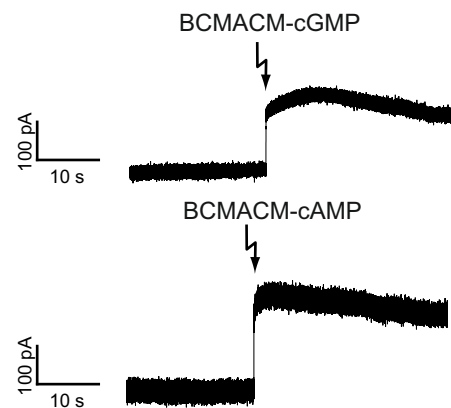**B**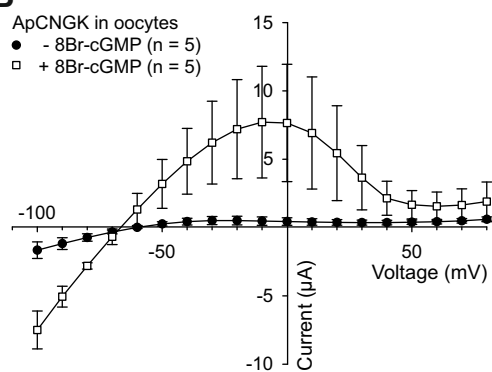

Figure 3-figure supplement 3

Supplement: supp [file elife-07624-supp-v1.zip]
